# Supplementary material for: Proteasome Inhibitors Silence Oncogenes in Multiple Myeloma through Localized Histone Deacetylase 3 Stabilization and Chromatin Condensation
Source: PubMed Central journal article supplement (PMC9949381; doi:10.1158/2767-9764.crc-22-0255), 2022-12-27
Supplement: NIHMS1858380-supplement-2.pdf [file NIHMS1858380-supplement-2.pdf]

Figure S1

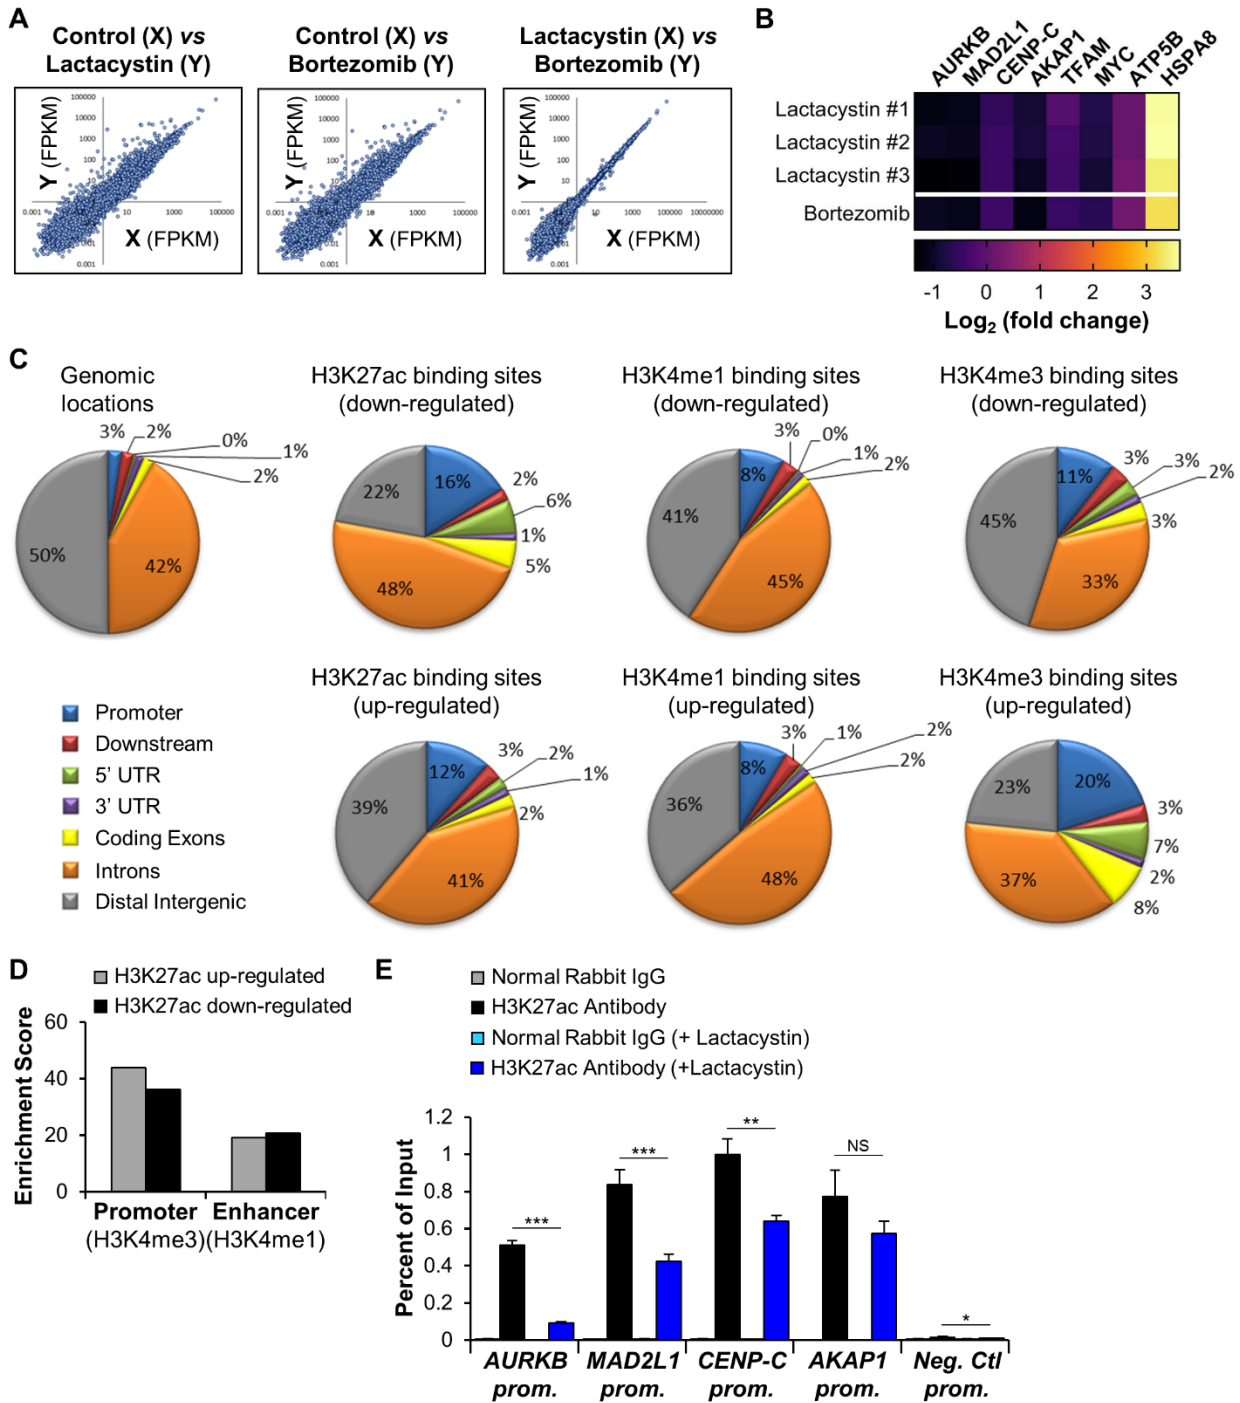

**Figure S1. Genome-wide analysis of acute effects of proteasome inhibition on transcription and chromatin in MM cells.**

**A**, The transcriptional effects of proteasome inhibition are comparable between the two inhibitors lactacystin and bortezomib. Pairwise scatter plots showing the correlation between the transcriptional targets of lactacystin and bortezomib after RNA-seq expression analysis in MM.1S cells. FPKM counts for all genes in samples treated with lactacystin and bortezomib or in respective control samples are plotted on a log-transformed scale.

**B**, RNA-seq heatmap showing differentially expressed cell cycle and mitochondrial genes upon treatment of MM.1S cells with proteasome inhibitors lactacystin or bortezomib.

**C**, Pie charts depicting the genome-wide patterns of histone modifications induced by proteasome inhibition in MM.1S cells. Following treatment with lactacystin, genomic location distribution and percentage of modulated H3K27ac, H3K4me1, and H3K4me3 epigenetic marks for each genomic location category are shown. Data are representative of two independent experiments.

**D**, Enrichment of H3K27ac mark near promoters (H3K4me3) and enhancers (H3K4me1) following treatment with lactacystin. H3K27 acetylation changes following proteasome inhibition are more common at promoter regions than enhancer regions in MM.1S cells. Data shows the overlap of H3K27ac peaks up- or down-regulated by lactacystin with H3K4me1 or H3K4me3 regions and is represented as the fold increase of altered H3K27ac sites at enhancers/promoters compared to random chromosomal regions. Data from a representative experiment out of two independent experiments are shown.

**E**, ChIP-qPCR analysis of H3K27ac DNA binding activity at selected promoters following proteasome inhibition with lactacystin in MOLP-8 cells. \*\*\* $p < 0.001$ , \*\* $p < 0.01$ , and \* $p < 0.05$  determined by unpaired Student's two-tailed t-test.
