# Supplementary material for: Proteasome Inhibitors Silence Oncogenes in Multiple Myeloma through Localized Histone Deacetylase 3 Stabilization and Chromatin Condensation
Source: PubMed Central journal article supplement (PMC9949381; doi:10.1158/2767-9764.crc-22-0255), 2022-12-27
Supplement: NIHMS1858380-supplement-8.pdf [file NIHMS1858380-supplement-8.pdf]

Figure S7

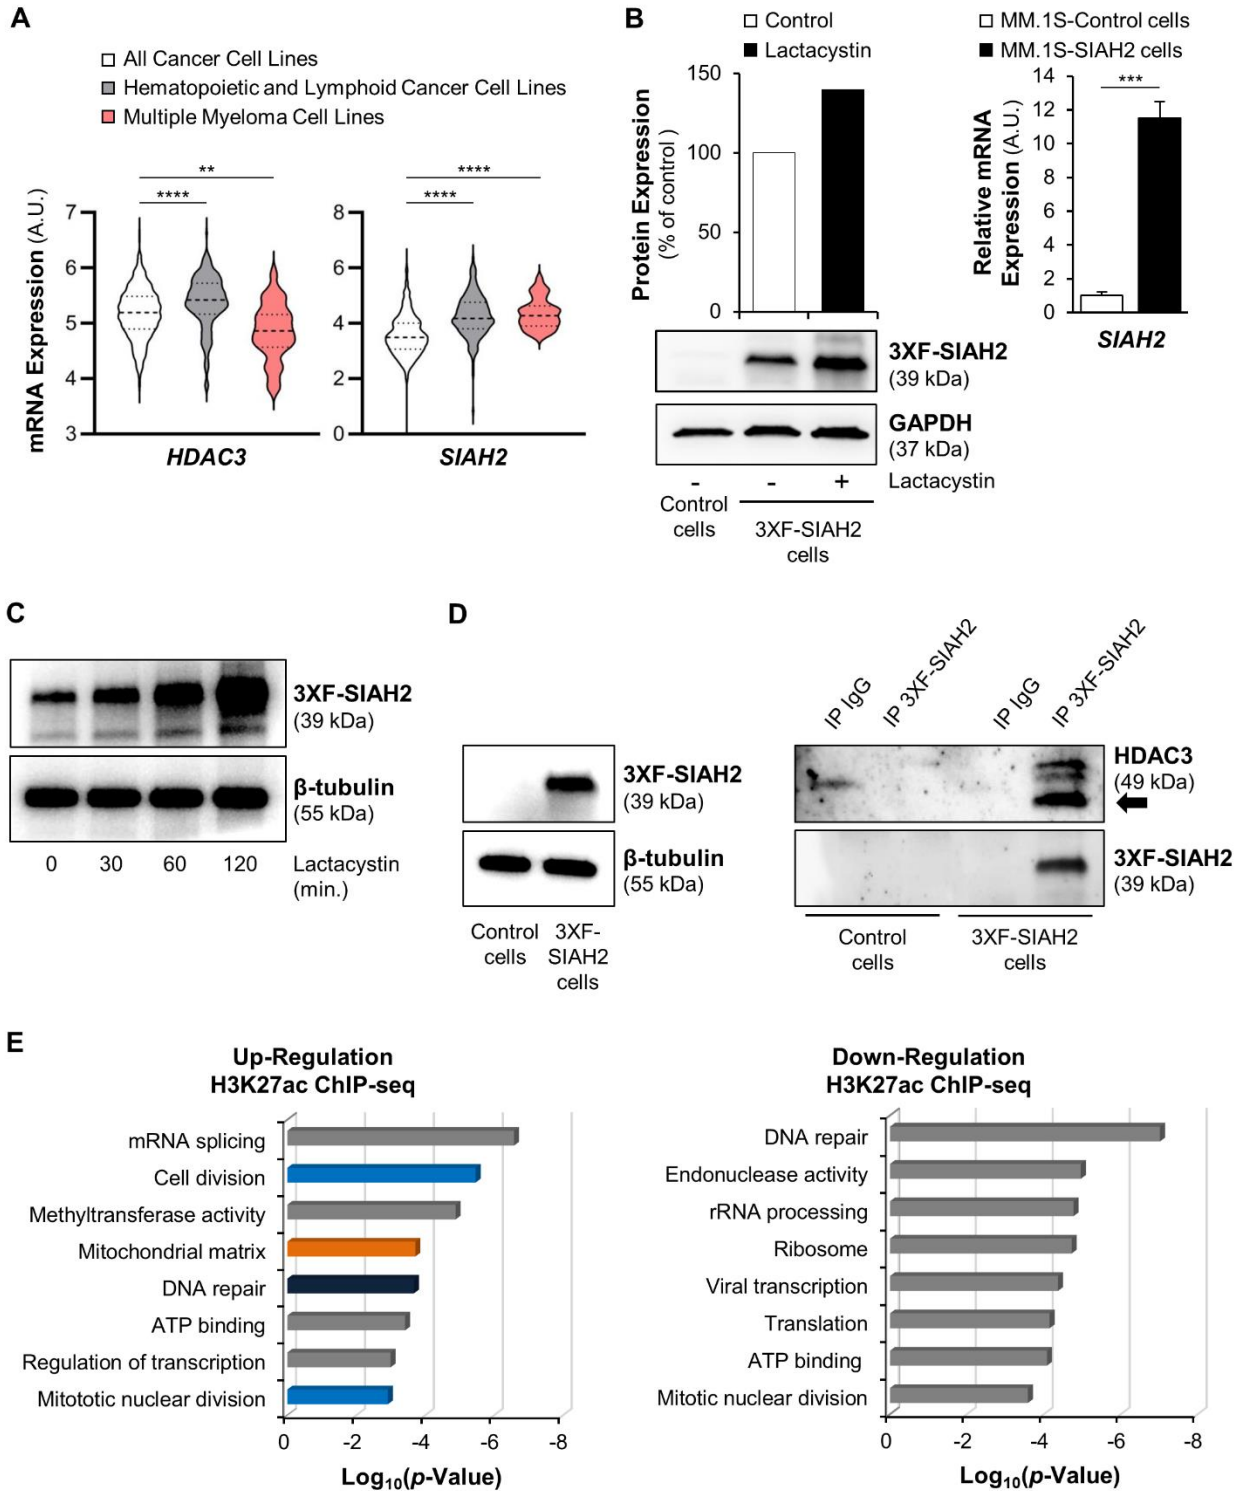

**Figure S7. The SIAH2 ubiquitin ligase antagonizes HDAC3-mediated repression in MM cells.**

**A**, *HDAC3* and *SIAH2* transcript levels were compared based on tissue origin in 1457 cancer cell lines. RNA-seq data available in the Cancer Cell Line Encyclopedia (CCLE, Broad Institute) was analyzed and statistical differences were determined by Mann-Whitney test (\*\*\*\* $p < 0.0001$  and \*\* $p = 0.0010$ ).

**B**, Validation of *SIAH2* overexpression in MM.1S cells. *SIAH2* expression levels were measured by Western blot (left panel) or RT-qPCR (right panel) to determine overexpression efficiency. The relative expression of *SIAH2* protein was quantified in Image J and normalized to that of *GAPDH* protein. \*\*\* $p < 0.001$  determined by unpaired Student's two-tailed t-test.

**C**, Expression of *SIAH2* is increased in MM.1S cells exposed to the proteasome inhibitor lactacystin (25 $\mu$ M). The exposure times are indicated at the bottom of the panel.  $\beta$ -tubulin was used as an internal control. The images were the result of one experiment.

**D**, *SIAH2* and *HDAC3* proteins interact in MM.1S cells. Immunoprecipitation of 3XF-*SIAH2* in MM.1S cells was followed by Western blot analyses to detect *HDAC3* protein and *SIAH2* protein (left panel). *SIAH2* overexpression was validated by Western blot (left panel). The images were the result a single experiment.

**E**, Functional distribution of gene clusters enriched in MM.1S-*SIAH2* cells. Following ChIP-seq in *SIAH2* overexpressing cells, up-regulated or down-regulated H3K27ac epigenetic marks were analyzed for significantly enriched functional annotation terms, as determined by DAVID algorithm. Data are representative of two independent experiments.
